# Supplementary material for: Precisely tailored LaFeO3dendrites using urea and piperazine hexahydrate for the highly selective and sensitive detection of trace level acetone
Source: Royal Society of Chemistry journal article supplement (doi:10.1039/d0ma00602e), 2020-01-01
Supplement: d0ma00602e1.pdf [file d0ma00602e1.pdf]

## Supplementary Information

# **Precisely Tailored LaFeO<sub>3</sub> Dendrites using Urea and Piperazine Hexahydrate for Highly Sensitive, Selective and Trace Level Detection of Acetone**

*K Palani Thiruppathi<sup>a,b</sup> and Devaraj Nataraj<sup>a,b,c\*</sup>*

<sup>a</sup> Physics Division, DRDO – BU Centre for Life Sciences, Bharathiar University Campus, Coimbatore – 641 046, India.

<sup>b</sup> Quantum Materials & Devices Laboratory, Department of Physics, Bharathiar University, Coimbatore – 641 046, India.

<sup>c</sup> UGC-CPEPA Centre for Advanced Studies in Physics for the development of Solar Energy Materials and Devices, Department of Physics, Bharathiar University, Coimbatore – 641 046, India.

\*Corresponding Author E-mail: [de.natraj2011@gmail.com](mailto:de.natraj2011@gmail.com)

**Table S1.** Detailed reactant concentrations and corresponding outcomes

| S. No | Sample code | Piperazine hexahydrate mM [mg] | Urea mM [mg]  | Before/ After pH | Crystalline Phase                                                                       | Morphology                             |
|-------|-------------|--------------------------------|---------------|------------------|-----------------------------------------------------------------------------------------|----------------------------------------|
| 1     | U9          | 0                              | 9<br>(540.54) | 2.67/9.30        | LaFeO <sub>3</sub>                                                                      | Irregular Particle with Aggregation    |
| 2     | U9P3        | 3<br>(582.69)                  | 9<br>(540.54) | 6.74/9.35        | La(OH) <sub>3</sub> , LaFeO <sub>3</sub>                                                | Parallelogram and Irregular Structures |
| 3     | U9P6        | 6<br>(1165.38)                 | 9<br>(540.54) | 9.49/9.56        | LaFeO <sub>3</sub>                                                                      | Dendritic Growth Initiation            |
| 4     | U9P9        | 9<br>(1748.07)                 | 9<br>(540.54) | 9.54/9.60        | LaFeO <sub>3</sub>                                                                      | Early - Stage Dendrites                |
| 5     | U9P12       | 12<br>(2330.76)                | 9<br>(540.54) | 9.88/9.92        | LaFeO <sub>3</sub>                                                                      | Mid - Stage Dendrites                  |
| 6*    | U9P15       | 15<br>(2913.45)                | 9<br>(540.54) | 9.90/9.90        | LaFeO <sub>3</sub>                                                                      | Fully Grown Dendrites                  |
| 7     | U9P18       | 18<br>(3496.14)                | 9<br>(540.54) | 10.01/10.03      | LaFeO <sub>3</sub>                                                                      | Fully Grown Dendrites                  |
| 8     | U9P21       | 21<br>(4078.83)                | 9<br>(540.54) | 10.10/10.12      | LaFeO <sub>3</sub>                                                                      | Fully Grown Dendrites                  |
| 9     | P15         | 15<br>(2913.45)                | 0             | 9.88/9.90        | La <sub>2</sub> O <sub>3</sub> , Fe <sub>2</sub> O <sub>3</sub> ,<br>LaFeO <sub>3</sub> | Matured Dendrites                      |

**Note :** (1) Stoichiometric ratio of 1 mM La(NO<sub>3</sub>)<sub>3</sub> · xH<sub>2</sub>O and 1 mM Fe(NO<sub>3</sub>)<sub>3</sub> · 9H<sub>2</sub>O were used for all reactions.  
 (2) The reaction temperature was kept at 180 °C for 24 h.  
 (3) The final products were dried at 110 °C for 1 h and calcinated at 900 °C for 3 h.  
 (4) \* represents the optimized final reactant concentration.

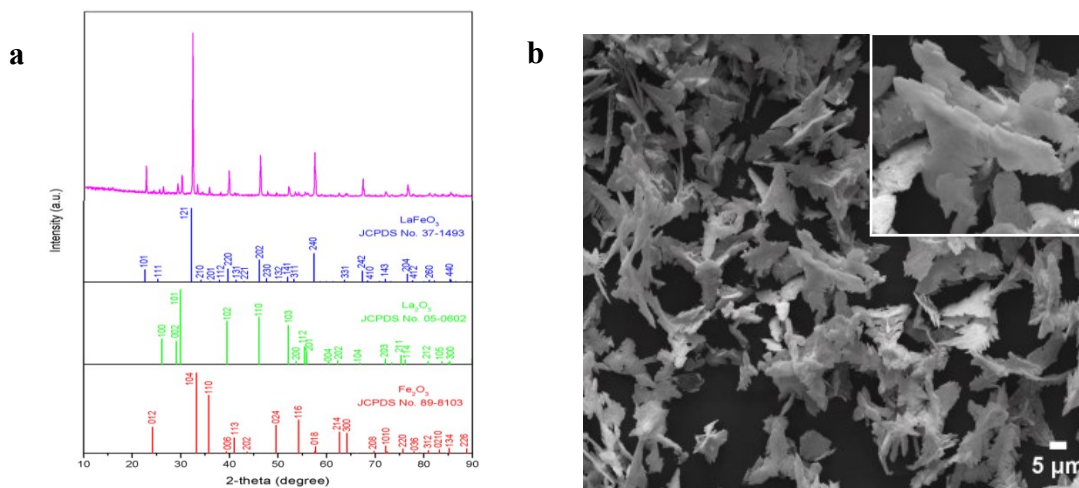

**Fig. S1** a) XRD pattern and b) SEM images of 15 mM piperazine hexahydrate (P15) assisted LaFeO<sub>3</sub> dendrites formation process.

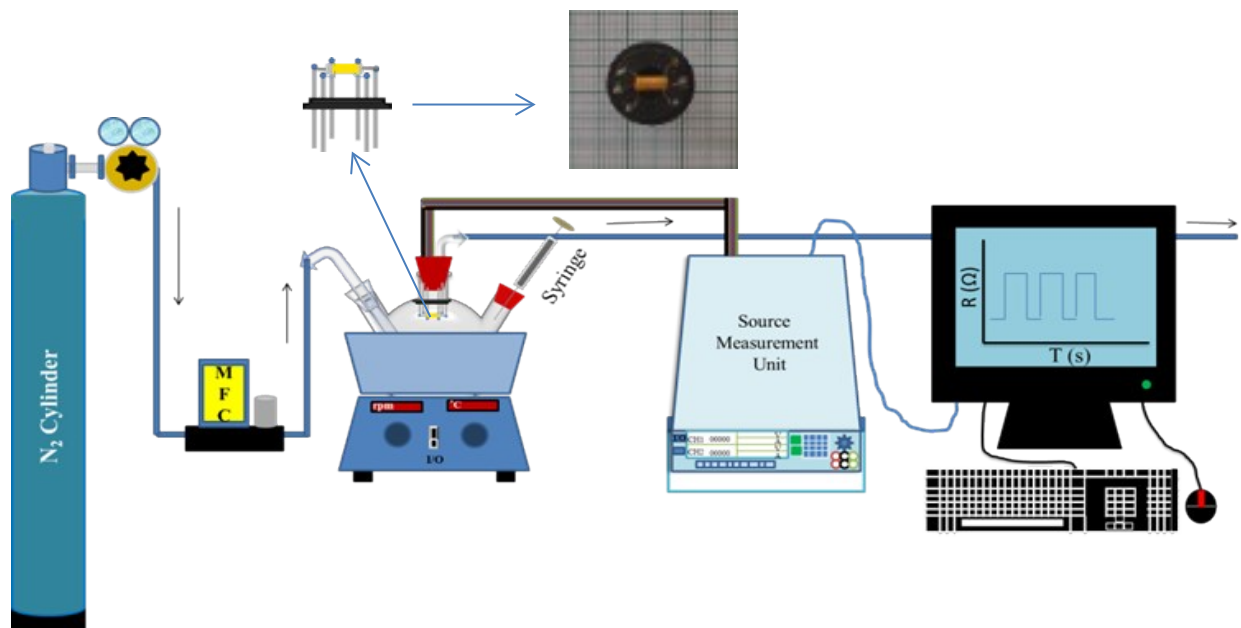

**Fig. S2** Schematic illustration of custom made vapor sensing arrangement and photograph of fabricated sensing device.

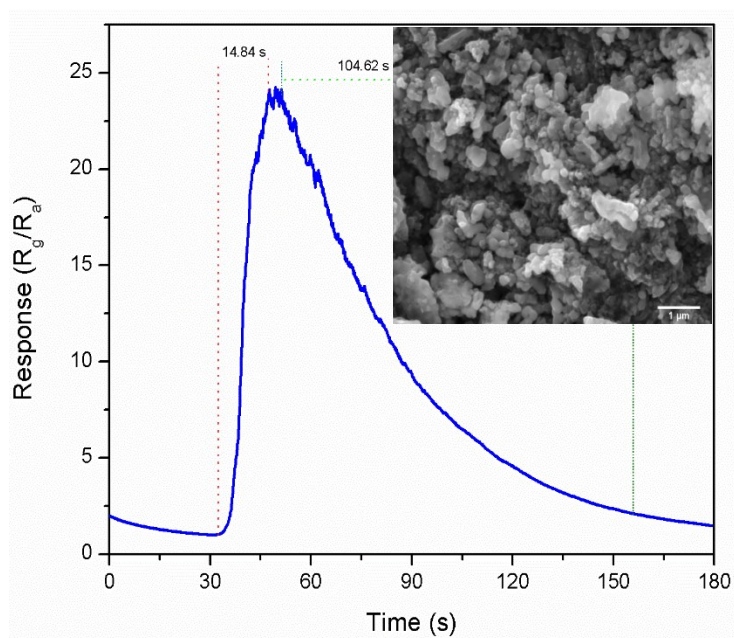

**Fig. S3** 1 ppm acetone sensing response using irregular  $\text{LaFeO}_3$  particles at  $100^\circ\text{C}$  device and chamber temperatures. (Inset : SEM image of irregular  $\text{LaFeO}_3$  particles)

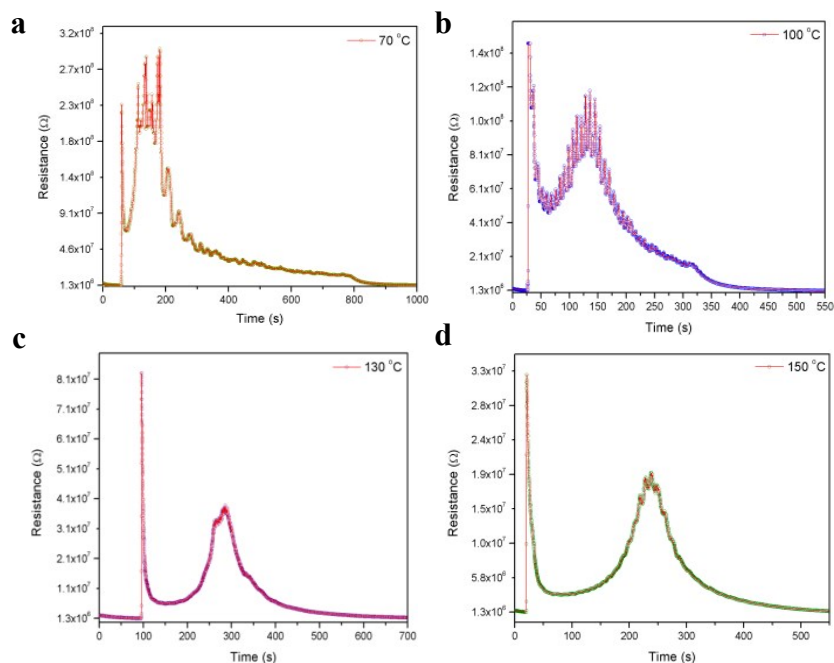

**Fig. S4** 10 ppm pure acetone sensing response using LaFeO<sub>3</sub> dendrites (U9P15) at a) 70 °C, b) 100 °C, c) 130 °C and d) 150 °C chamber temperatures with 100 °C device temperature.

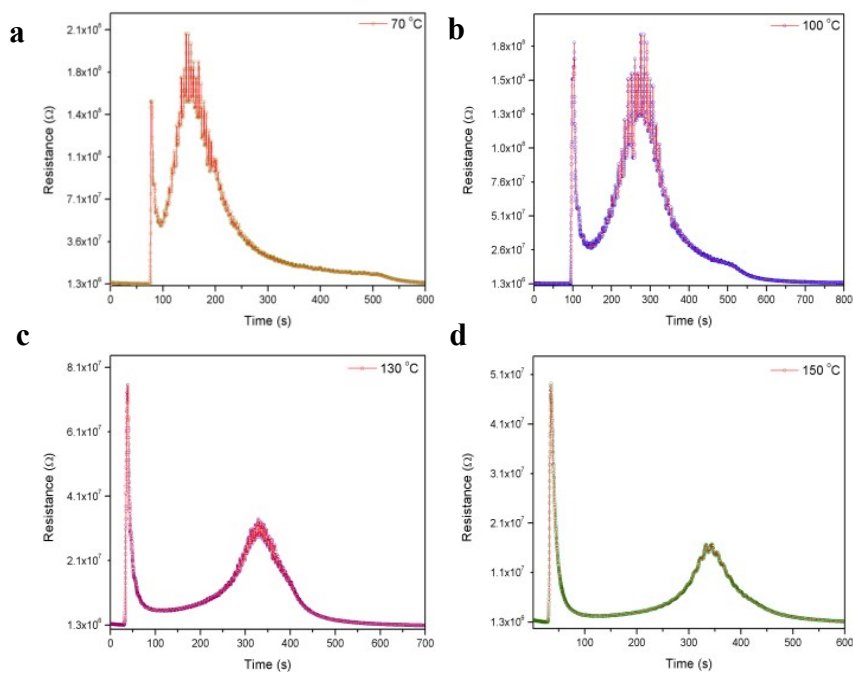

**Fig. S5** 10 ppm pure ethanol sensing response using LaFeO<sub>3</sub> dendrites (U9P15) at a) 70 °C, b) 100 °C, c) 130 °C and d) 150 °C chamber temperatures with 100 °C device temperature.

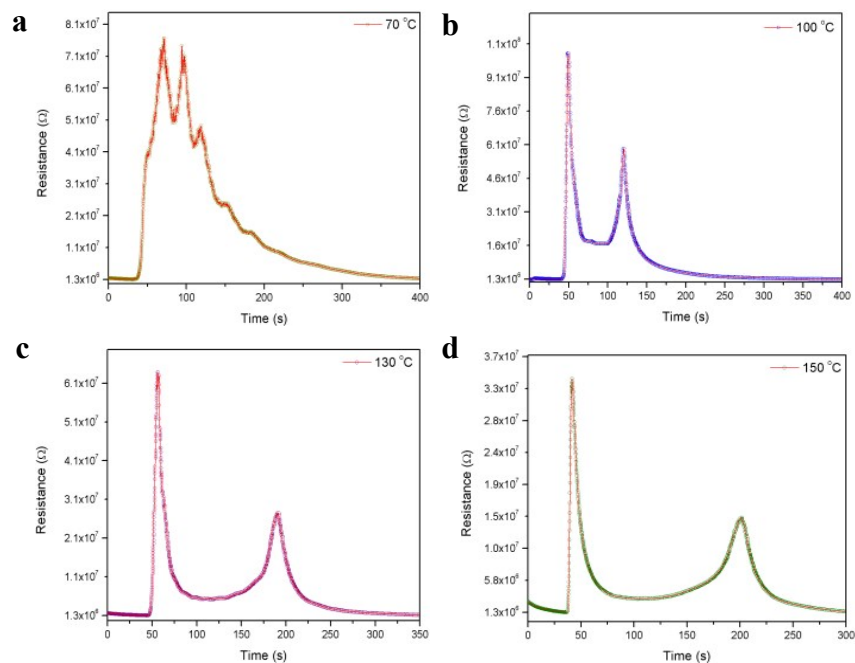

**Fig. S6** 10 ppm (37 - 41%) formaldehyde sensing response using LaFeO<sub>3</sub> dendrites (U9P15) at a) 70 °C, b) 100 °C, c) 130 °C and d) 150 °C chamber temperatures with 100 °C device temperature.

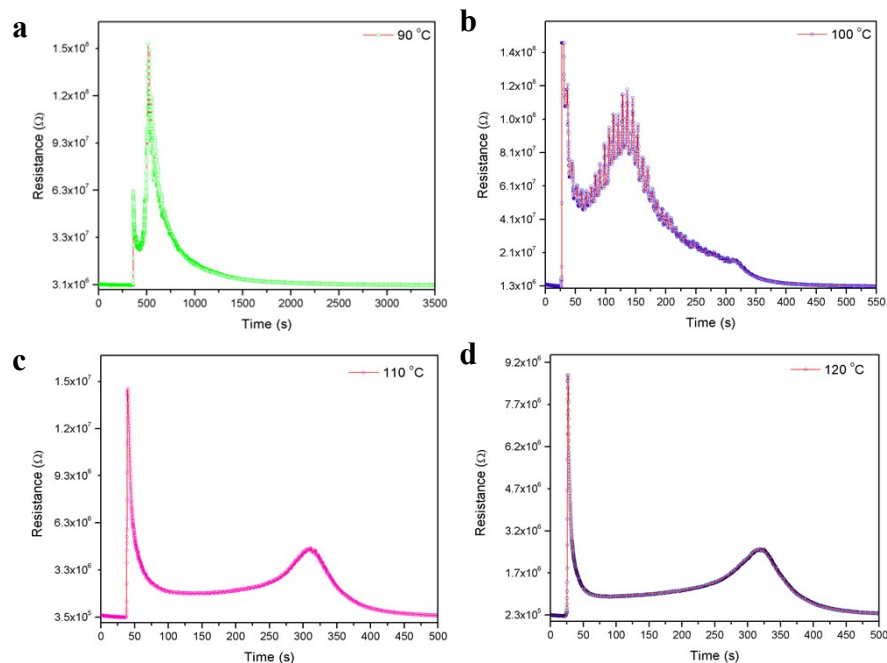

**Fig. S7** 10 ppm pure acetone sensing response using LaFeO<sub>3</sub> dendrites (U9P15) at a) 90 °C, b) 100 °C, c) 110 °C and d) 120 °C device temperatures with 100 °C chamber temperature.

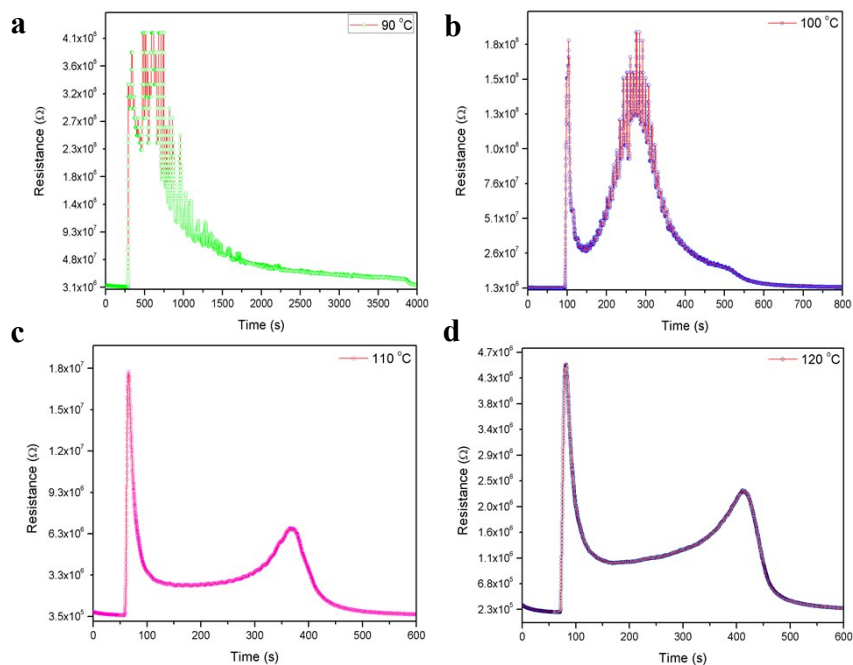

**Fig. S8** 10 ppm pure ethanol sensing response using LaFeO<sub>3</sub> dendrites (U9P15) at a) 90 °C, b) 100 °C, c) 110 °C and d) 120 °C device temperatures with 100 °C chamber temperature.

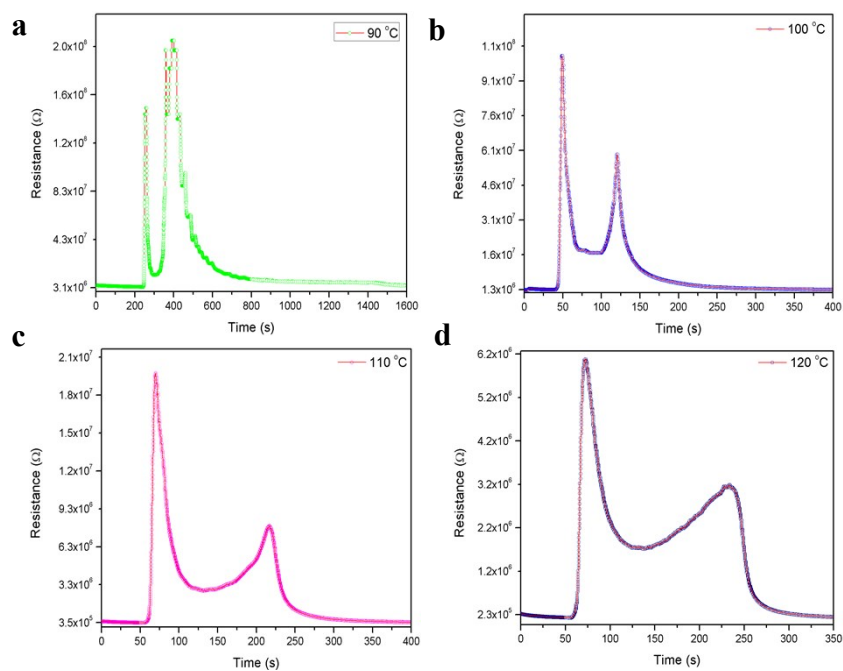

**Fig. S9** 10 ppm (37 - 41%) formaldehyde sensing response using LaFeO<sub>3</sub> dendrites (U9P15) at a) 90 °C, b) 100 °C, c) 110 °C and d) 120 °C device temperatures with 100 °C chamber temperature.

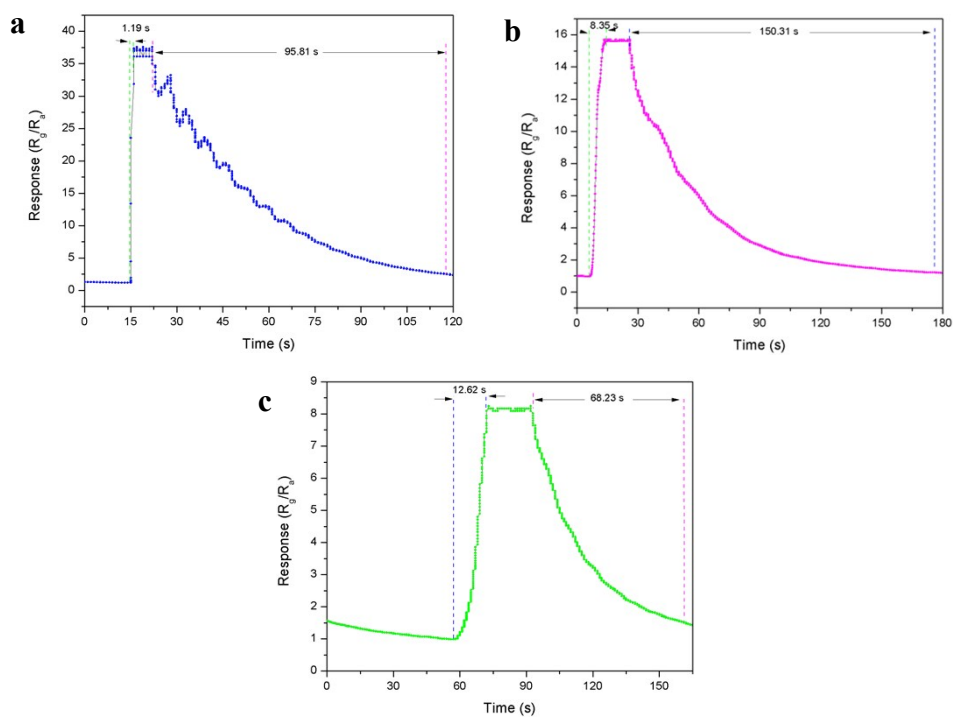

**Fig. S10** Response / recovery time of 1 ppm (a) acetone, (b) ethanol and (c) formaldehyde at 100 °C device and chamber temperatures.

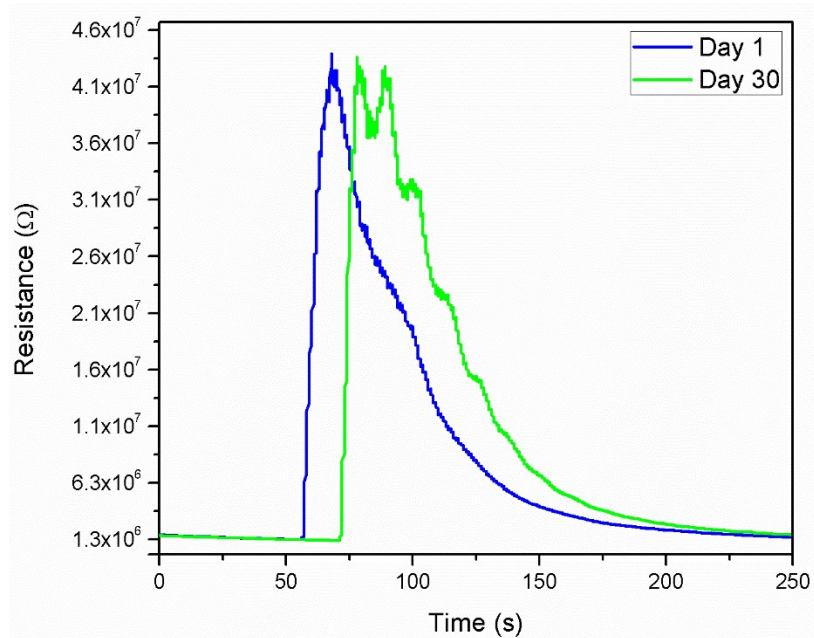

**Fig. S11** Comparison of 1 ppm acetone sensing response for day 1 and day 30 using LaFeO<sub>3</sub> dendrites at 100 °C device and chamber temperatures.

**Table S2.** Comparison of recently reported acetone sensors with the present LaFeO<sub>3</sub> dendrites based device.

| Sensing Materials                                                                       | Concentration [ppm] | Sensing Response $S = R_g/R_a$ or $R_a/R_g$ | $T_{res/rec}$ [s] | Lowest Detection [ppm] | Operating Temperature [°C] | Ref              |
|-----------------------------------------------------------------------------------------|---------------------|---------------------------------------------|-------------------|------------------------|----------------------------|------------------|
| <b>3 mol% Co-doped Spongy-like In<sub>2</sub>O<sub>3</sub></b>                          | 100                 | 32.8                                        | 1.14/37.5         | 5                      | 240                        | 1                |
| <b>Porous WO<sub>3</sub> Nanofibers</b>                                                 | 12.5                | 1.79                                        | 33/42             | 1.8                    | 350                        | 2                |
| <b>3 wt% Pd:SmFe<sub>0.9</sub>Mg<sub>0.1</sub>O<sub>3</sub> Nanocrystalline Powders</b> | 0.5                 | 7.16                                        | 32/8              | 0.01                   | 220                        | 3                |
| <b>Co<sub>3</sub>O<sub>4</sub> Core–Shell</b>                                           | 200                 | 13                                          | 4/8               | 10                     | 190                        | 4                |
| <b>PdO–NiO/NiCo<sub>2</sub>O<sub>4</sub> Truncated Nanocages</b>                        | 100                 | 6.7                                         | 19/28             | 10                     | 210                        | 5                |
| <b>Porous Tube-like Au/ZnO</b>                                                          | 100                 | 280                                         | 2/92              | 1                      | 190                        | 6                |
| <b>0.070 wt% Pt-Functionalized CS-Pt@SnO<sub>2</sub> Nanofiber</b>                      | 1                   | 37.9                                        | 12/44             | 0.1                    | 350                        | 7                |
| <b>Bi<sub>2</sub>O<sub>3</sub> Nanostructures</b>                                       | 100                 | 41%                                         | 315/152           | 10                     | 27                         | 8                |
| <b>Hollow NiFe<sub>2</sub>O<sub>4</sub> Microspindles</b>                               | 200                 | 52.8                                        | 14.2/>100         | 5                      | 120                        | 9                |
| <b>MWCNTs/Co<sub>3</sub>O<sub>4</sub> Octahedron</b>                                    | 100                 | 5.1                                         | -                 | 10                     | 120                        | 10               |
| <b>Multilayer-assembled ZnO Nanoplates</b>                                              | 100                 | 21.56                                       | 9/51              | 0.25                   | 230                        | 11               |
| <b>Concave ZnFe<sub>2</sub>O<sub>4</sub> Hollow Octahedral Nanocages</b>                | 100                 | 35.5                                        | -                 | 5                      | 120                        | 12               |
| <b>PdO–Co<sub>3</sub>O<sub>4</sub> Hollow Nanocages</b>                                 | 5                   | 2.51                                        | -                 | 0.4                    | 350                        | 13               |
| <b>PdO–ZnO Composite on Hollow SnO<sub>2</sub> Nanotubes</b>                            | 1                   | 5.06                                        | 16/36             | 0.1                    | 400                        | 14               |
| <b>PtO<sub>2</sub> - SnO<sub>2</sub> Multichannel Nanofibers</b>                        | 5                   | 194.15                                      | <12/-             | 0.4                    | 400                        | 15               |
| <b>γ-Fe<sub>2</sub>O<sub>3</sub> Microrod</b>                                           | 100                 | 125.5                                       | 0.9/15            | 10                     | 220                        | 16               |
| <b>LaFeO<sub>3</sub> Dendrites</b>                                                      | <b>1</b>            | <b>37.63</b>                                | <b>1.19/95.81</b> | <b>0.01</b>            | <b>100</b>                 | <b>This work</b> |



## References

- 1 X. Zhang, D. Song, Q. Liu, R. Chen, J. Liu, H. Zhang, J. Yu, P. Liu and J. Wang, *CrystEngComm*, 2019, **21**, 1876.
- 2 M. Imran, S. S. A. A. H. Rashi, Y. M. Sabri, N. Motta, T. Tesfamichael, P. M. Sonar and M. Shafiei, *J. Mater. Chem. C*, 2019, **7**, 2961.
- 3 H. Zhang, H. Qin, P. Zhang, and J. Hu, *ACS Appl. Mater. Interfaces*, 2018, **10**, 15558.
- 4 R. Zhang, T. Zhou, L. Wang, and T. Zhang, *ACS Appl. Mater. Interfaces*, 2018, **10**, 9765.
- 5 T. Zhou, X. Liu, R. Zhang, Y. Wang, and T. Zhang, *ACS Appl. Mater. Interfaces*, 2018, **10**, 37242.
- 6 H. Fu, X. Wang, P. Wang, Z. Wang, H. Ren and C. Wang, *Dalton Trans.*, 2018, **47**, 9014.
- 7 Y. J. Jeong, W. Koo, J. Jang, D. Kim, H. Cho and I. Kim, *Nanoscale*, 2018, **10**, 13713.
- 8 P. Shinde, B. Ghule, N. M. Shinde, Q. X. Xia, S. Shaikh, A. V. Sarode, R. S. Mane and K. H. Kim, *New J. Chem.*, 2018, **42**, 12530.
- 9 X. Song, F. Sun, S. Dai, X. Lin, K. Sun and X. Wang, *Inorg. Chem. Front.*, 2018, **5**, 1107.
- 10 R. Zhang, M. Zhang, T. Zhou and T. Zhang, *Inorg. Chem. Front.*, 2018, **5**, 2563.
- 11 M. Wang, Z. Shen, Y. Chen, Y. Zhang and H. Ji, *CrystEngComm*, 2017, **19**, 6711.
- 12 X. Z. Song, Y. L. Meng, Z. Tan, L. Qiao, T. Huang, and X. F. Wang, *Inorg. Chem.* 2017, **56**, 13646.
- 13 W. T. Koo, S. Yu, S. J. Choi, J. S. Jang, J. Y. Cheong, and I. D. Kim, *ACS Appl. Mater. Interfaces*, 2017, **9**, 8201.
- 14 W. T. Koo, J. S. Jang, S. J. Choi, H. J. Cho, and I. D. Kim, *ACS Appl. Mater. Interfaces* 2017, **9**, 18069.
- 15 Y. J. Jeong, W. T. Koo, J. S. Jang, D. H. Kim, M. H. Kim, and I. D. Kim, *ACS Appl. Mater. Interfaces*, 2018, **10**, 2016.
- 16 Z. Song, H. Chen, S. Bao, Z. Xie, Q. Kuang and L. Zheng, *J. Mater. Chem. A*, 2020, **8**, 3754.
